# Supplementary material for: Solvent hydrophobicity induced complex coacervation of dsDNA and in situ formed zein nanoparticles
Source: Royal Society of Chemistry journal article supplement (doi:10.1039/c7sm01222e), 2017-01-01
Supplement: c7sm01222e1.pdf [file c7sm01222e1.pdf]

**Supplementary Information**

**Solvent Hydrophobicity induced Complex Coacervation of dsDNA and *in situ* formed Zein nanoparticles**

Pankaj Kumar Pandey<sup>1</sup>, Priyanka Kaushik<sup>2</sup>, Kamla Rawat<sup>2,3\*</sup>, V. K. Aswal<sup>4</sup>,  
and H. B. Bohidar<sup>1,2\*</sup>

<sup>1</sup>School of Physical Sciences, Jawaharlal Nehru University, New Delhi 110067, India

<sup>2</sup>Special Center for Nanosciences, Jawaharlal Nehru University, New Delhi 110067, India

<sup>3</sup>Inter University Accelerator Centre, New Delhi 110067, India

<sup>4</sup>State Physics Division, Bhabha Atomic Research Centre, Mumbai 400085, India

\*Corresponding authors email: [bohi0700@mail.jnu.ac.in](mailto:bohi0700@mail.jnu.ac.in), [kamla.jnu@gmail.com](mailto:kamla.jnu@gmail.com)

**Fig. S1.** Variation of solution turbidity (100-%T) has shown for different ethanol concentrations. DNA concentration was fixed at 0.01% (w/v). The inset photographs depict no growth in turbidity as ethanol concentration (v/v) was increased.

**Fig. S2.** FTIR spectra of DNA, Zein and DNA-Zein complex coacervate.

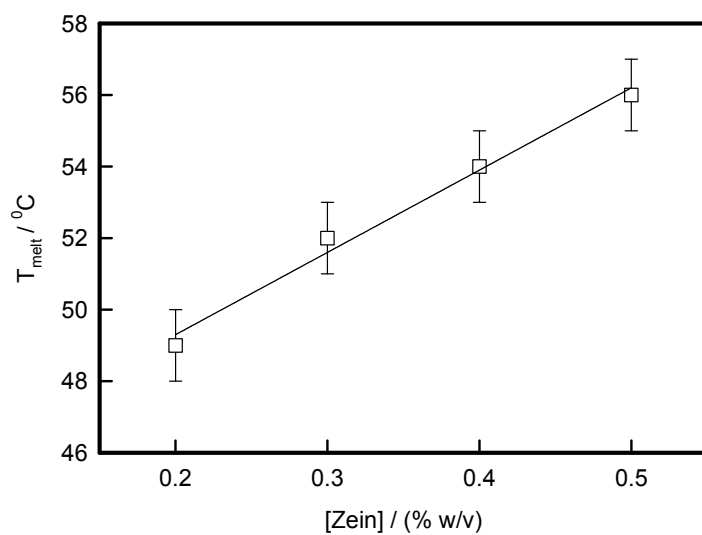

**Fig. S3.** Melting temperature  $T_{\text{melt}}$  of coacervates shown for different Zein concentrations.
